# Supplementary material for: The AFF-1 exoplasmic fusogen is required for endocytic scission and seamless tube elongation
Source: PubMed Central journal article supplement (PMC5931541; doi:10.1038/s41467-018-04091-1), 2018-05-01
Supplement: 41467_2018_4091_MOESM1_ESM.pdf [file 41467_2018_4091_MOESM1_ESM.pdf]

# Supplementary information for

## **The AFF-1 exoplasmic fusogen is required for endocytic scission and seamless tube elongation**

### **Authors**

Fabien Soulavie<sup>1</sup>, David H. Hall<sup>2</sup> and Meera V. Sundaram<sup>1\*</sup>

<sup>1</sup>Dept. of Genetics, University of Pennsylvania Perelman School of Medicine,  
Philadelphia, Pennsylvania, United States of America

<sup>2</sup>Department of Neuroscience, Albert Einstein College of Medicine, Bronx, New  
York, United States of America

**\*Author for correspondence**

**446a Clinical Research Building**

**415 Curie Blvd.**

**Philadelphia PA 19104**

**[sundaram@mail.med.upenn.edu](mailto:sundaram@mail.med.upenn.edu)**

**(215) 573-4527**

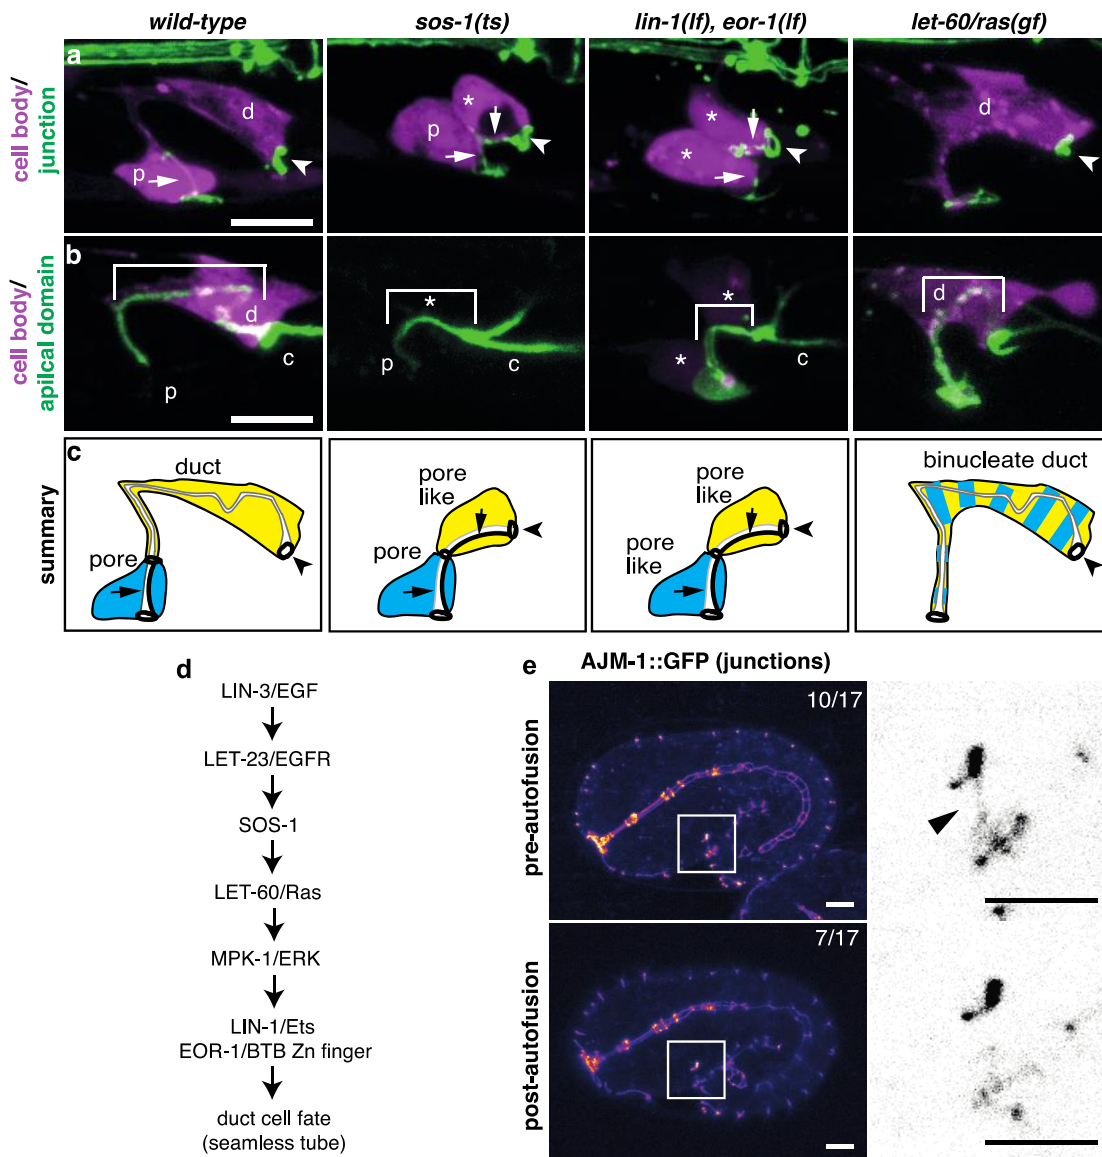

**Supplementary Figure 1: EGF-Ras signaling promotes excretory duct fate, auto-fusion and shaping**

**(a and b)** Confocal Z-projections of duct and pore cells in early L1 larvae. **(a)** EGF-RAS-ERK signaling promotes auto-fusion. In magenta the duct (d) and pore (p) cell bodies with *dct-5pro::mCherry*, and in green the junction marker *ajm-1::GFP*. Arrows show cell auto-junctions, arrow-heads show duct-canal junctions. **(b)** EGF-RAS-ERK signaling promotes lumen elongation. In magenta the duct cell body with *lin-48pro::mRFP*, and in green the apical domain marker *rdy-2::GFP*. Brackets show duct lumen position. \* = cell with altered fate. In Wild type, the duct lacks an auto-junction and has an elongated lumen. In the Ras pathway mutant *sos-1(cs41ts)* grown at restrictive temperature and in *lin-1(n304) eor-1(cs28)* double mutants, the two cells adopt a pore-like fate with auto-junctions and a short lumen. The duct cell body marker *lin-48pro::mCherry* is not expressed in *sos-1(cs41ts)* **(b)** at restrictive temperature and very weakly in *lin-1(n304) eor-1(cs28)* double mutant. In the constitutively active Ras mutant *let-60(n1046gf)*, the two cells fuse to make a binucleate duct-like cell without an auto-junction and with an elongated lumen. **(c)** schematics of phenotypes observed. **(d)** The canonical EGF-Ras-ERK signaling pathway leading to duct cell fate. **(e)** Confocal microscopy of two 1.5-fold stage embryos showing the cell junction marker *ajm-1::GFP*. Dorsal side up, anterior left in these and all subsequent images. At this stage, 10/17 embryos had a remaining duct auto-junction (upper panel) and 7/17 embryos showed no duct auto-junction (lower panel). Boxed regions are magnified in right panels. The arrow-head shows duct auto-junction. Scale bar = 5  $\mu$  m.

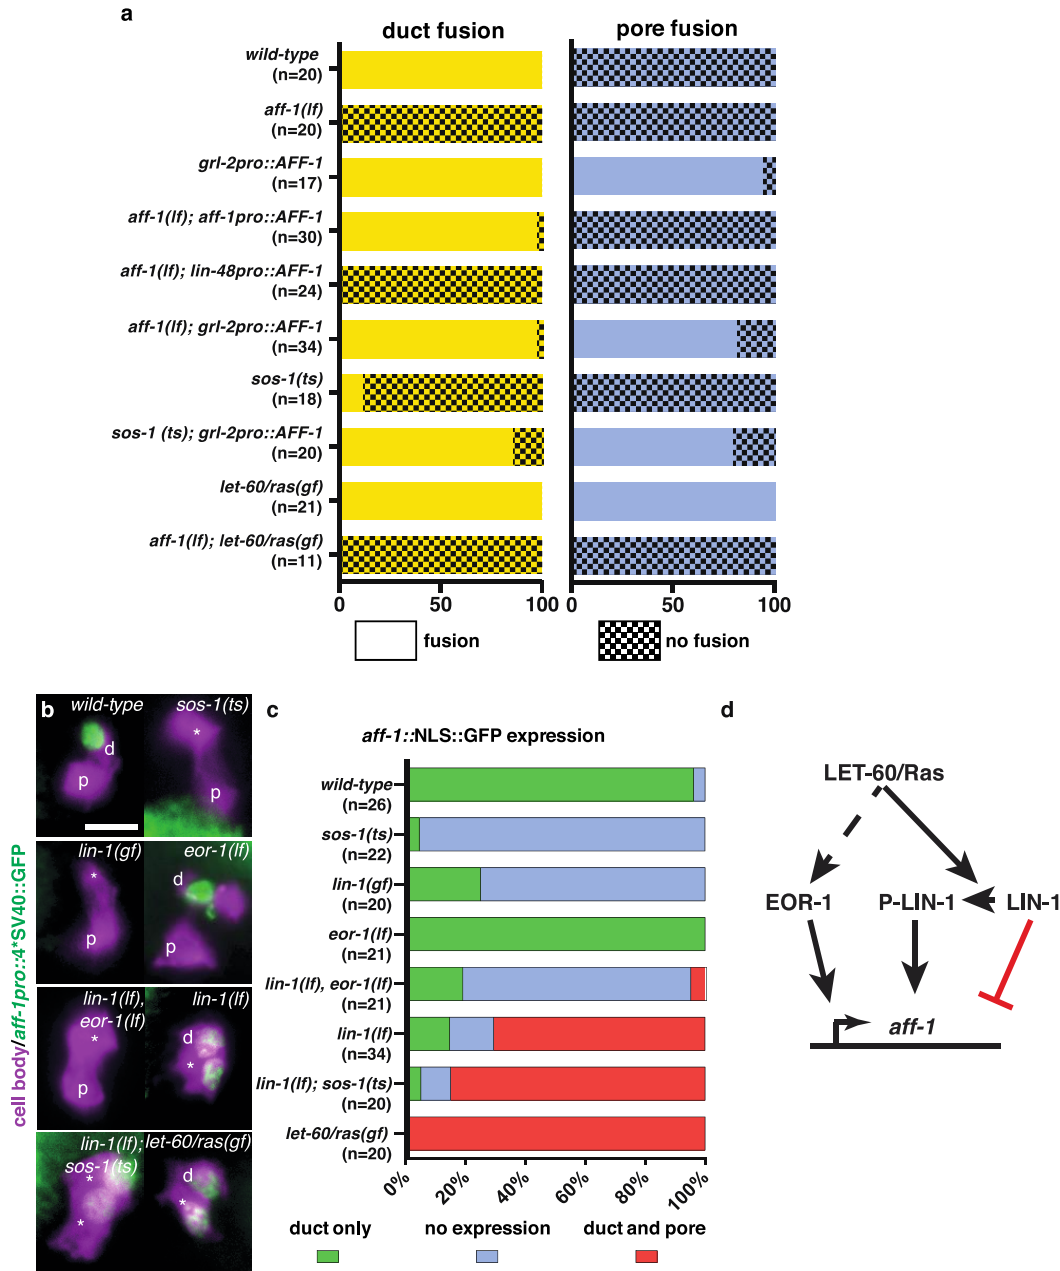

**Supplementary Figure 2: Ras signaling promotes *aff-1* expression and auto-fusion through LIN-1 and EOR-1 Nuclear Factors.** (a) Quantification of duct and pore auto-fusion in designated mutants. In WT, only the duct auto-fuses. In *aff-1(tm2214)* mutants, neither cell fuses. When AFF-1 is expressed in both cells with *grl-2pro*, both cells fuse, including in *aff-1(tm2214)* or the Ras signaling mutant *sos-1(cs41ts)*. The *aff-1(tm2214)* auto-fusion phenotype is rescued by expression of *aff-1* cDNA with a 5.4kb *aff-1* promoter. Later expression of *aff-1* with *lin-48pro* is not sufficient to rescue duct auto-fusion, suggesting there is a discrete window of time when auto-fusion can occur. Most Ras pathway mutants have cell fate transformations<sup>1</sup>; in these cases, duct and pore refer to the dorsal and ventral cells, respectively. Both cells fuse in the *let-60/Ras(n1046)* gain of function mutant, but the auto-fusions are abolished in the double mutant *aff-1(tm2214); let-60(n1046)*, showing that AFF-1 acts downstream of the Ras signaling pathway. For each cell, comparisons between genotypes were made by a one-tailed Fisher's Exact test and all relevant comparisons were p value < 0.0001. (b) 3-fold stage embryos of designated mutants expressing *aff-1pro::NLS-GFP*, showing the most common phenotype quantified in (c). d=duct cell; p=pore cell; \* = cell with altered fate. (d) Model for *aff-1* transcriptional regulation by Ras signaling and the nuclear factors LIN-1 and EOR-1. P-LIN-1 is the ERK-phosphorylated form of LIN-1<sup>2</sup>. Dashed arrow represents potential Ras-ERK-dependent regulation of EOR-1<sup>3,4</sup>. Scale bar = 5  $\mu$  m.

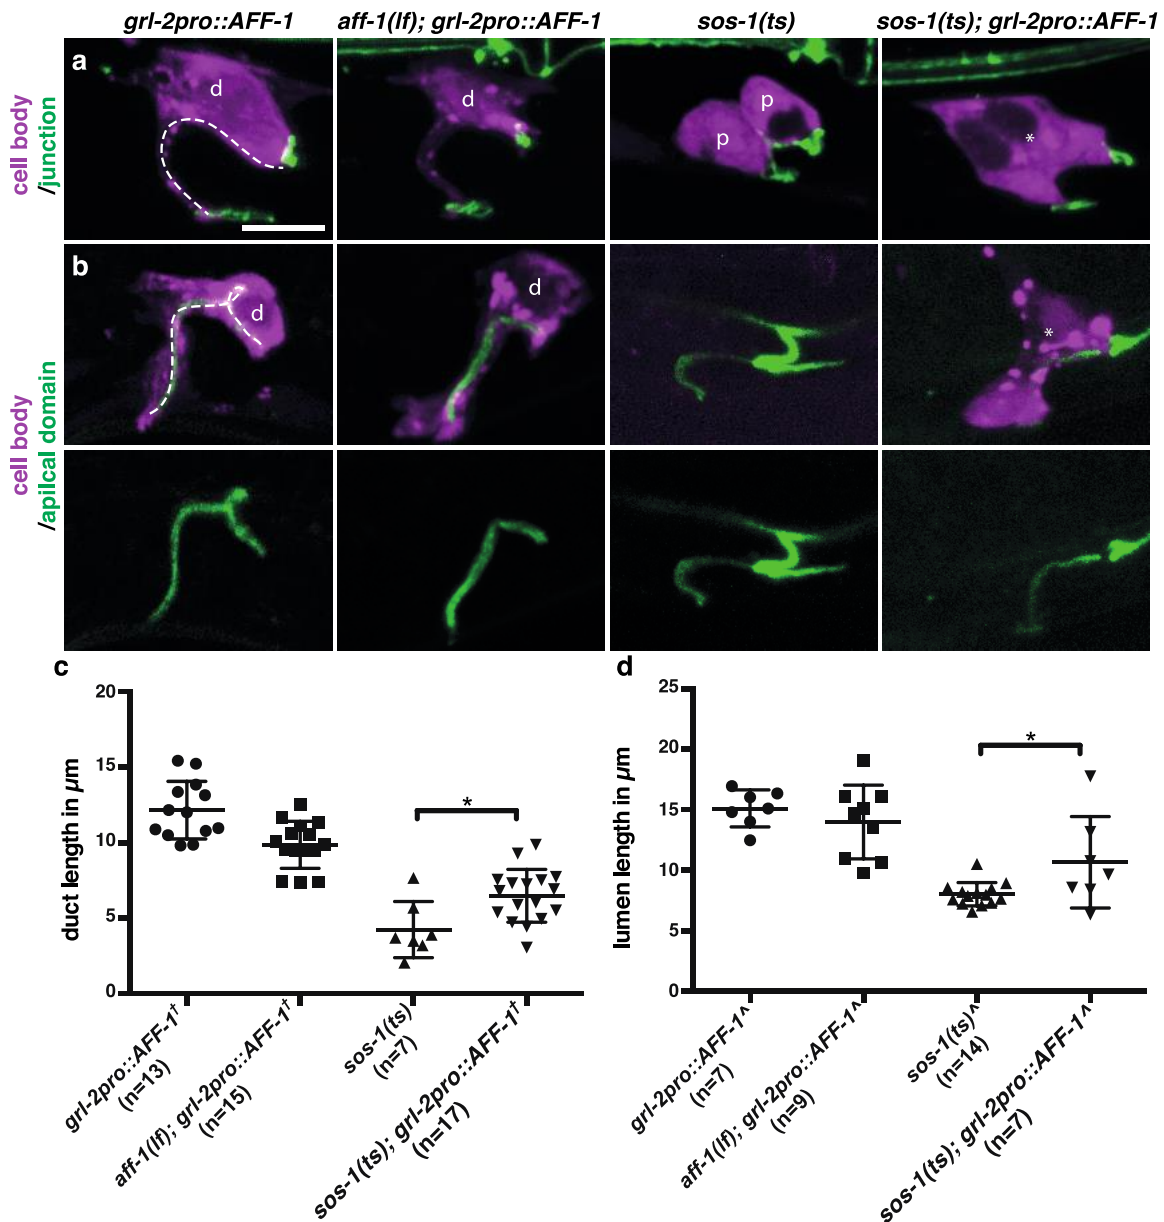

**Supplementary Figure 3: AFF-1 is not sufficient to promote lumen elongation in Ras signaling mutants.** (a and b) Confocal Z-projections of L1 stage larvae. Duct cell is labeled with *lin-48pro::mRFP* (*grl-2pro::AFF-1* and *aff-1(lf); grl-2pro::AFF-1*), *dct-5pro::mCherry* (*sos-1(ts)*) or *grl-2pro::mCherry* (*sos-1(ts); grl-2pro::AFF-1*) (magenta). In green, cell junctions are labeled with *ajm-1::GFP* in “a”, or apical domains are labeled with *let-653::SfGFP* (*grl-2pro::AFF-1* and *aff-1(lf); grl-2pro::AFF-1*) or *rdy-2::GFP* (*sos-1(ts)* and *sos-1(ts); grl-2pro::AFF-1*) in “b”. The excretory duct cell body and lumen have an elongated shape in *grl-2pro::AFF-1* or *aff-1(tm2214); grl-2pro::AFF-1*, but are shorter in *sos-1(cs41ts)* and *sos-1(cs41ts); grl-2pro::AFF-1*. (c) Measurements of duct cell length tracing from the pore-duct junction to the duct-canal junction, as indicated with the dotted line in panel “a” *grl-2::pro::AFF-1*. (d) Measurements of duct cell length, tracing as indicated with dotted line in panel “b” *grl-2::pro::AFF-1*. †=measure on a binucleate cell. ^=duct and pore lumen. Error bars =  $\pm$  standard deviation (SD). Scale bar = 5  $\mu\text{m}$ . \* =  $p$ -value < 0.05, Mann-Whitney test.

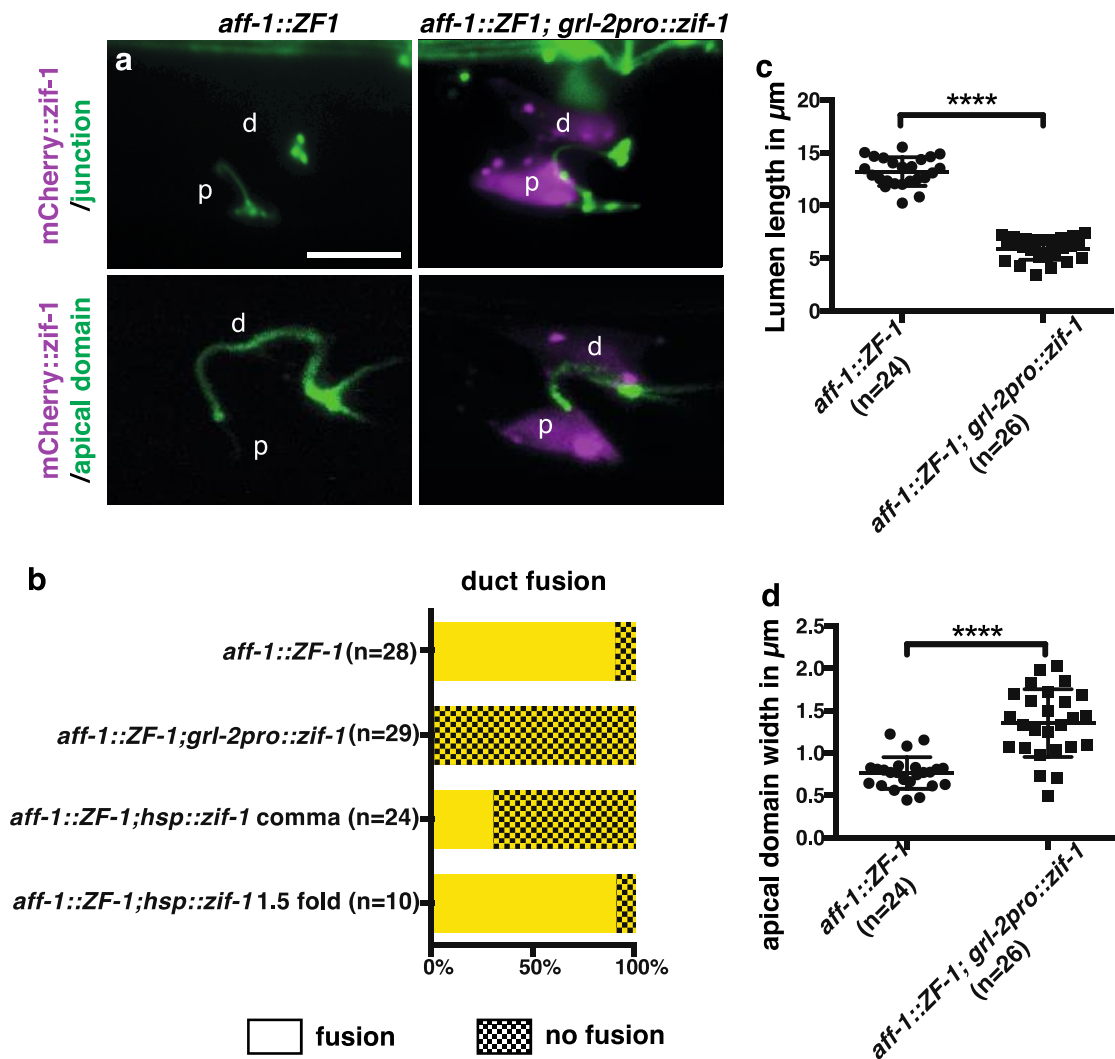

**Supplementary Figure 4: Early conditional knock-down of *aff-1* in the duct and pore prevents excretory duct auto-fusion and tube elongation.** (a) Confocal Z-projections of L1 stage larvae, d, duct; p, pore. The cell junctions are labeled in green with *ajm-1::GFP* (upper panels) or apical domains are labeled in green with *rdy-2::GFP* (lower panels) and the ZIF-1::mCherry expression pattern is labeled in magenta. The fusion protein AFF-1::ZF1 expressed by the CRISPR-Cas9 gene edited allele *aff-1(cs232, [aff-1::zif1])* is able to drive excretory duct auto-fusion and lumen elongation (left panels) and can be targeted for early degradation by the protease ZIF-1 expressed with *grl-2pro::zif-1::mCherry* (right panels) to prevent auto-fusion and lumen elongation. (b) shows quantification of the duct fusion phenotype in *aff-1(cs232, [aff-1::zif1])* animals with various ZIF-1-expressing transgenes, including heat-shock promoter (hsp)-driven expression before (comma stage) and after (1.5-fold stage) the normal time of duct auto-fusion. Comparisons were made by one-tailed Fisher's Exact test, and all the relevant comparisons were p value < 0.0001. (c) and (d) show quantification of duct lumen length and apical domain width respectively. \*\*\*\*= p-value < 0.0001. Mann-Whitney test. Error bars =  $\pm$  SD. Scale bar = 5  $\mu$  m.

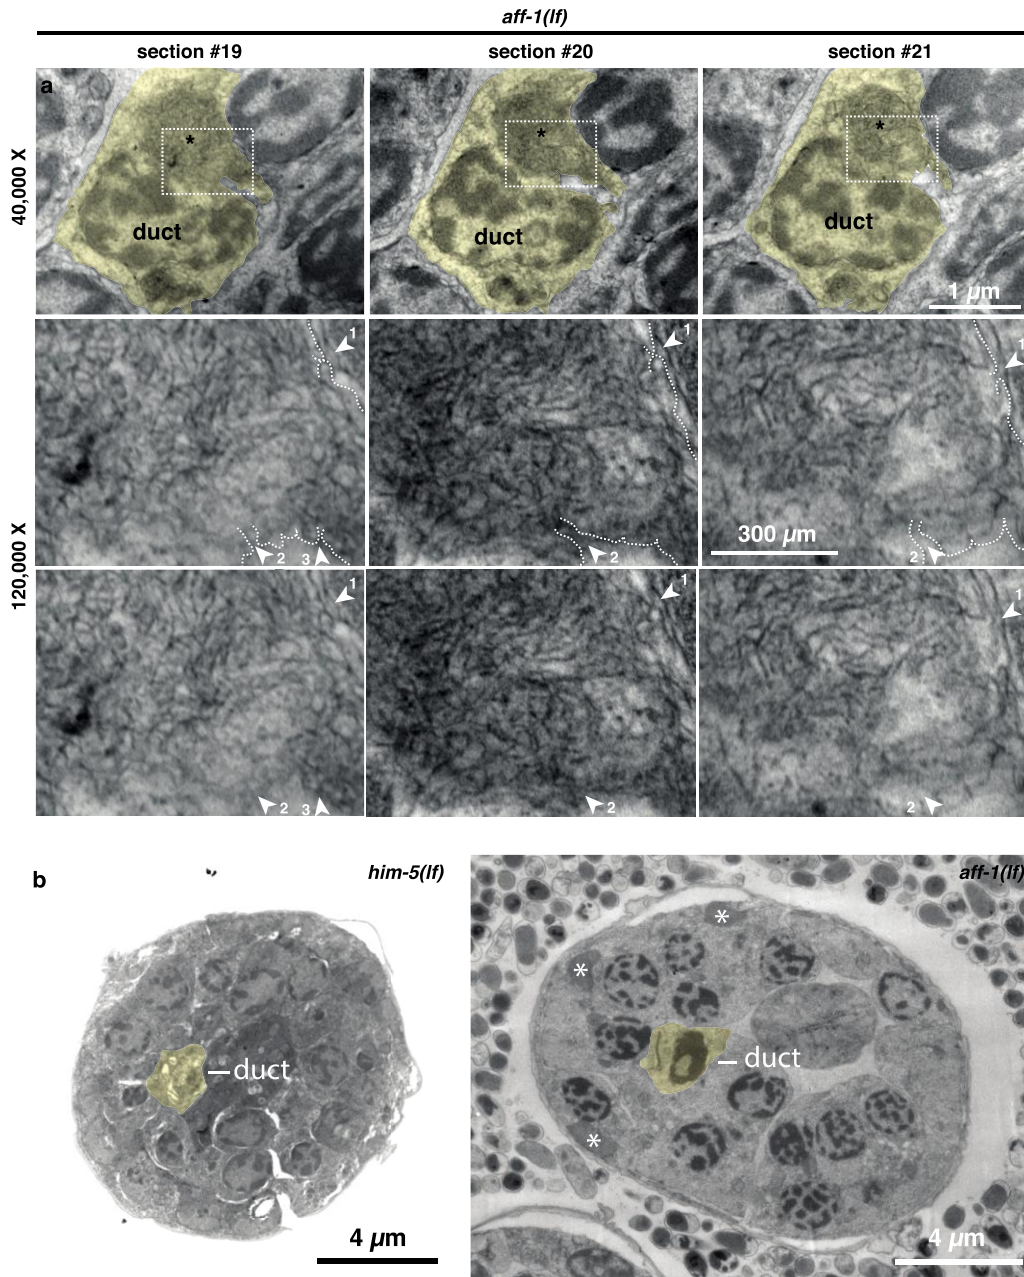

**Supplementary Figure 5: *aff-1* mutants accumulate membrane inclusions connected to the basal plasma membrane.** (a) Serial TEM sections of the *aff-1(tm2214)* L1 larva shown in Figure 5a. The upper panels show a 40,000X magnification (with duct cell post-colored in yellow), and the middle and lower panels show the boxed region at 120,000X magnification. A large membrane inclusion (\*) can be observed adjacent to the cell edge. In the middle panels, the dotted lines show the position of the basal plasma membrane, and the arrowheads show three positions where the basal plasma membrane invaginates into the large membrane inclusion. The lower panels are identical to the middle panels without membrane indication. (b) TEM transverse slices of normal (*him-5(e1490)*) or *aff-1(tm2214)* L1 duct (post-colored in yellow). Asterisks indicate membrane inclusions in hypodermal cells.

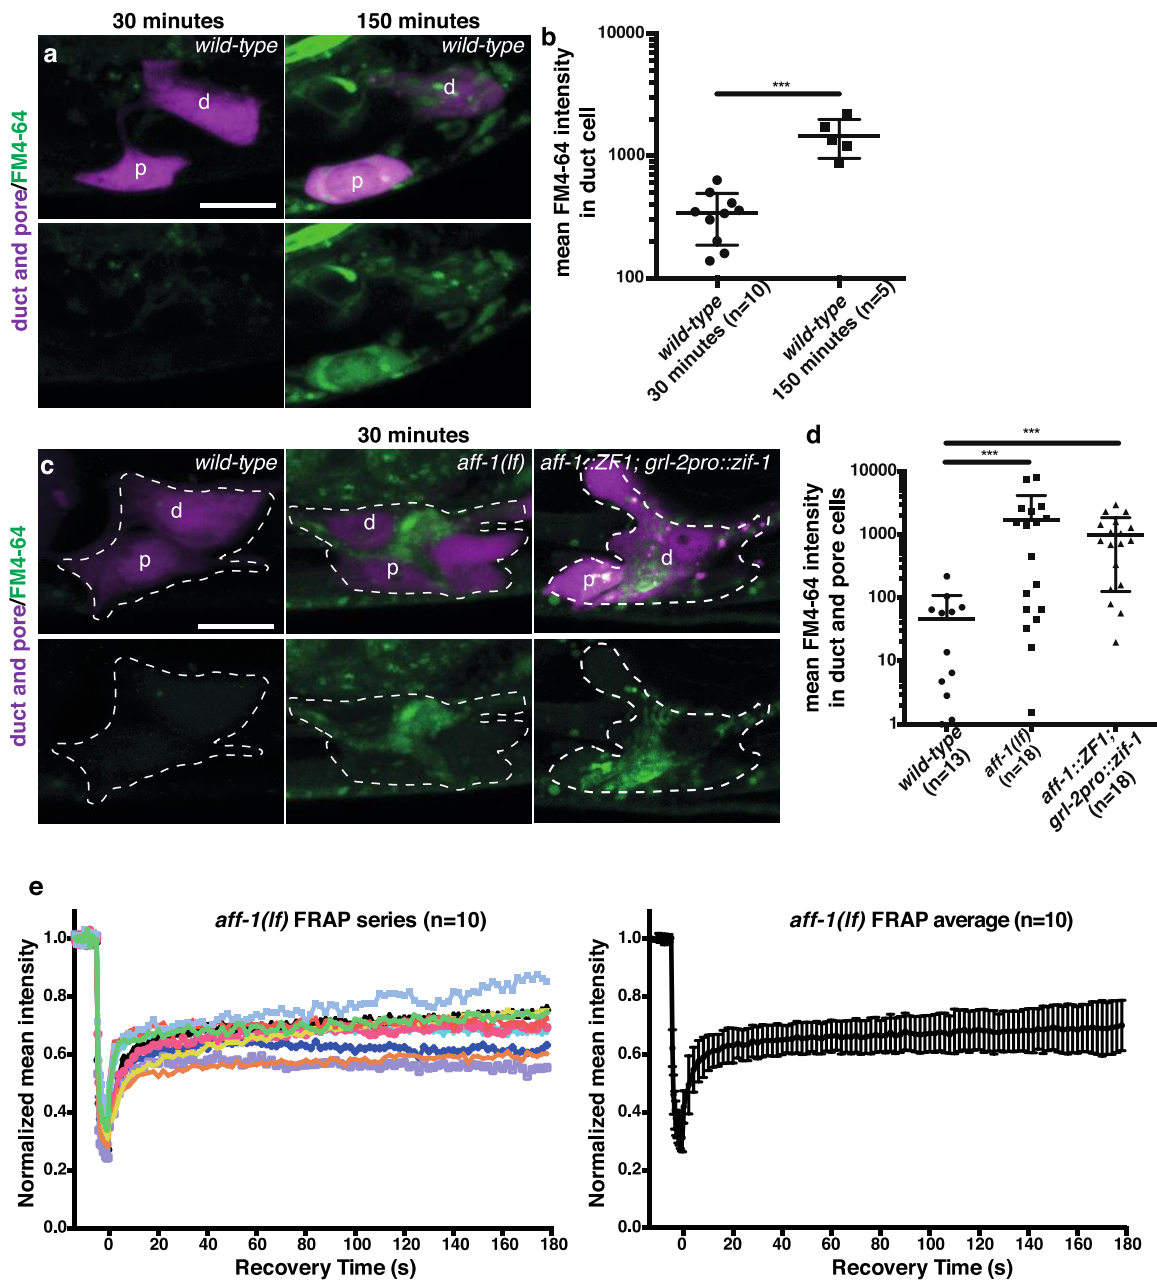

**Supplementary Figure 6: The duct cell accumulate lipid binding dyes. a.** L1 larvae. **c.** L4 larvae. **a** and **c.** Confocal Z-projections. In magenta the duct (d) and pore (p) cell bodies with *grl-2pro::YFP*, and in green FM4-64 dye. **(a and b)** *Wild-type* L1s have little or no dye penetration after a 30 minute exposure + 30 minute recovery and a moderate penetration after a 150 minute exposure + 30 minute recovery, demonstrating endocytic activity in these cells. Scale bar = 5  $\mu$  m. **(c and d)** *Wild-Type* L4s have little or no dye penetration after a 30 minute exposure + 30 minute recovery, but significant penetration is observed in *aff-1(tm2214)* mutants or in the duct and pore-specific *aff-1* knock down [*aff-1(cs232), [aff-1::zif1]*]; *grl-2pro::zif-1*. Scale bar = 10  $\mu$  m. **b** and **d** show quantification of dye fluorescence intensity in the duct, or in both the duct and pore, respectively. Note logarithmic scale. Some data points were “0” could not be shown on this scale. \*\*\*= *p*-value < 0.001, Mann and Whitney test. **(e)** Time lapse of Fluorescence Recovery After Photo-bleaching as shown in Figure 5d, showing the fluorescence recovery of FM4-64 in *aff-1(tm2214)* mutants. The left panel shows the complete set of data on 10 L1 larvae. The right panel shows the average and the standard deviation of the same set of data. Error bars =  $\pm$  SD.

Supplementary **Table 1.**

*C. elegans* strains used in this work

| strain name | full genotype                                                                                                            |
|-------------|--------------------------------------------------------------------------------------------------------------------------|
| AD281       | <i>him-5(e1490) V</i>                                                                                                    |
| BP601       | <i>aff-1(tm2214)/mln1 II</i>                                                                                             |
| SU93        | <i>jcls1(ajm-1::gfp,rol-6) IV</i>                                                                                        |
| UP2030      | <i>let-60, jcls1(ajm-1::gfp,rol-6) IV</i>                                                                                |
| UP2042      | <i>jcls1(ajm-1::gfp,rol-6) IV;csEx256(lin-48::mRFP,unc-119)</i>                                                          |
| UP2118      | <i>unc-119 III;jcis-1(ajm-1::gfp, rol-6) IV;qnEx-59(dct-5p::mRFP), unc-119+</i>                                          |
| UP2314      | <i>mcEx337(VHA-5::GFP, rol-6d)</i>                                                                                       |
| UP2369      | <i>jcls1(ajm-1::gfp,rol-6) IV;sos-1(cs41) V;qnEx59(dct-5p::mRFP)</i>                                                     |
| UP2369      | <i>jcls1(ajm-1::gfp,rol-6) IV;sos-1(cs41) V;qnEx59(dct-5p::mRFP)</i>                                                     |
| UP2594      | <i>aff-1(tm2214)/mln1 II;jcls1(ajm-1::gfp,rol-6) IV;CsEx256(lin-48::mRFP)</i>                                            |
| UP2595      | <i>aff-1(tm2214)/mln1 II;jcls1(ajm-1::gfp,rol-6)IV</i>                                                                   |
| UP2659      | <i>aff-1(tm2214)/mln1 II;jcls1(ajm-1::gfp,rol-6)IV;CsEx419(lin-48::aff-1)</i>                                            |
| UP2684      | <i>csEx444 (let-653p::LET-653-sfGFP, lin-48p::mRFP)</i>                                                                  |
| UP2726      | <i>aff-1(tm2214)/mln1 II; jcls1(ajm-1::gfp,rol-6)IV; csEx451 (grl-2p::aff-1, myo-2::mRFP)</i>                            |
| UP2834      | <i>aff-1(tm2214)/mln1 II; csEx444 (let-653p::LET-653-SF-GFP, lin-48p::mRFP)</i>                                          |
| UP2874      | <i>aff-1(tm2214)/mln1 II; jcls1(ajm-1::gfp,rol-6) IV; csEx539 (aff-1p::AFF-1, myo-2p::mRFP)</i>                          |
| UP2883      | <i>csIs62 (aff-1p::4*SV40::GFP, grl-2p::mRFP)</i>                                                                        |
| UP2907      | <i>csIs62 (aff-1p::4*SV40::GFP, grl-2p::mRFP); lin-1 (n304)/nT1g[qls51] IV</i>                                           |
| UP2908      | <i>csIs62 (aff-1p::4*SV40::GFP, grl-2p::mRFP)/+; lin-1 (n304), eor-1(cs28)/nT1g[qls51] IV</i>                            |
| UP2909      | <i>csIs62 (aff-1p::4*SV40::GFP, grl-2p::mRFP); lin-1 (n1761)/nT1g[qls51] IV</i>                                          |
| UP2925      | <i>csIs61(RDY-2::GFP, lin-48pro::mRFP)</i>                                                                               |
| UP2931      | <i>jcls1(ajm-1::gfp,rol-6) IV; sos-1(cs41,ts) V; csEx453 (grl-2p::aff-1, myo-2p::mRFP)</i>                               |
| UP2963      | <i>csIs62 (aff-1p::4*SV40::GFP, grl-2p::mRFP); jcis1, eor-1(cs28) IV</i>                                                 |
| UP2964      | <i>sos-1(cs41) V; csIs62 (aff-1p::4*SV40::GFP, grl-2p::mRFP)</i>                                                         |
| UP3008      | <i>aff-1(tm2214) II;csEx585(aff-1p::AFF-1, lin-48p::mRFP, lin-48p::LET-653::sfGFP)</i>                                   |
| UP3024      | <i>csEx587(grl-2p::AFF-1, lin-48p::mRFP, lin-48p::LET-653::sfGFP)</i>                                                    |
| UP3053      | <i>aff-1(tm2214)/mln1 II; jcls1(ajm-1::gfp,rol-6) IV; csEx585(aff-1p::AFF-1, lin-48p::mRFP, lin-48p::LET-653::sfGFP)</i> |
| UP3078      | <i>aff-1(tm2214)/mln1 II; let-60(n1046), jcls1(ajm-1::gfp,rol-6) IV</i>                                                  |
| UP3120      | <i>lin-1(n304) IV; sos-1(cs41) V; csIs62(aff-1p::4*SV40::GFP, grl-2p::mRFP)</i>                                          |
| UP3161      | <i>lin-1(n304) eor-1/nT1[qls51] IV; csIs61 (RDY-2::GFP, lin-48pro::mCherry)</i>                                          |
| UP3176      | <i>jcls1(ajm-1::gfp,rol-6) IV;sos-1(cs41) V;CsEx677(grl-2pro::mRFP, grl-2pro::AFF-1))</i>                                |
| UP3177      | <i>lin-1(n304), eor-1(cs28)/nT1[qls51] IV;wIs78 X; qnEx59(dct-5pro::mRFP)</i>                                            |



Supplementary **Table 1.** (Continued)

| <b>strain name</b> | <b>full genotype</b>                                                                                                                       |
|--------------------|--------------------------------------------------------------------------------------------------------------------------------------------|
| UP3183             | <i>aff-1(tm2214)/mIn1 II; jcls1(ajm-1::gfp,rol-6), let-60(n1046) IV; csEx444 (let-653p::LET-653-SF-GFP, lin-48p::mRFP)</i>                 |
| UP3186             | <i>jcls1(ajm-1::gfp,rol-6) IV; csEx672(grl-2pro::AFF-1, lin-48p::mRFP)</i>                                                                 |
| UP3187             | <i>let-60(n1046) IV; csEx444(let-653p::LET-653-SF-GFP, lin-48p::mRFP)</i>                                                                  |
| UP3188             | <i>let-60(n1046) IV; csIs62 (aff-1p::4*SV40::GFP, grl-2p::mRFP)</i>                                                                        |
| UP3196             | <i>let-60(n1046), jcls1(ajm-1::gfp,rol-6) IV; csEx256(lin-48pro::mCherry)</i>                                                              |
| UP3199             | <i>sos-1(cs41) V; csEx680(grl-2pro::AFF-1, grl-2pro::mRFP; RDY-2::GFP)</i>                                                                 |
| UP3206             | <i>aff-1(tm2214)/mIn1 II; mcEx337(vha-5::GFP, rol-6)</i>                                                                                   |
| UP3207             | <i>aff-1(tm2214)/mIn1 II; jcls1(ajm-1::gfp,rol-6), let-60(n1046) IV; csEx256 (lin-48p::mRFP)</i>                                           |
| UP3430             | <i>csEx813(grl-2pro::YFP)</i>                                                                                                              |
| UP3431             | <i>csEx814 (aff-1pro::aff-1::mCherry, grl-2pro::YFP)</i>                                                                                   |
| UP3476             | <i>aff-1(cs232, [aff-1::ZF1, sqt-1(d), hs::cre, hygRO]) II; jcls1(ajm-1::gfp,rol-6) IV; csEx749 (grl-2pro ::zif-1, CC ::GFP)</i>           |
| UP3486             | <i>aff-1(cs232, [aff-1::ZF1, sqt-1(d), hs::cre, hygRO]) II; rdy-2 (cs233,[rdy-2::GFP]); csEx749 (grl-2pro ::zif-1, CC ::GFP) V</i>         |
| UP3488             | <i>aff-1(cs232, [aff-1::ZF1, sqt-1(d), hs::cre, hygRO]) II; rdy-2 (cs233,[rdy-2::GFP]) V</i>                                               |
| UP3521             | <i>aff-1(cs232, [aff-1::ZF1, sqt-1(d), hs::cre, hygRO]) II; rdy-2 (cs233,[rdy-2::GFP]) V; csEx847(hsp::zif-1::mCherry, ajm-1::mCherry)</i> |
| UP3532             | <i>let-60(n1046) IV; csIs61(RDY-2::GFP, lin-48pro::mRFP)</i>                                                                               |
| UP3538             | <i>rab-11(tm2063) I/hT2[bli-4(e937) let-?(q782) qls48]; rdy-2 (cs233,[rdy-2::GFP]) V</i>                                                   |
| UP3558             | <i>dyn-1(ky51ts) X; rdy-2 (cs233,[rdy-2::GFP]) V</i>                                                                                       |
| UP3564             | <i>chc-1(b1025ts) III/hT2[bli-4(e937) let-?(q782) qls48]; rdy-2 (cs233,[rdy-2::GFP]) V</i>                                                 |
| UP3563             | <i>rab-5 (ok2605) I/hT2[bli-4(e937) let-?(q782) qls48]; rdy-2 (cs233,[rdy-2::GFP]) V</i>                                                   |

Supplementary **Table 2.**

Transgenes used in this work

| <b>Name</b>    | <b>Description</b>                                                | <b>Type</b>                           | <b>Construction</b>                                                                                                       |
|----------------|-------------------------------------------------------------------|---------------------------------------|---------------------------------------------------------------------------------------------------------------------------|
| <i>csEx527</i> | <i>aff-1p::4*SV40::GFP, grl-2pro::mCherry</i>                     | multi-copy external chromosomal array | Injection of pFS115 (30 ng $\mu\text{L}^{-1}$ ) and pFS107 (30 ng $\mu\text{L}^{-1}$ )                                    |
| <i>csIs62</i>  | <i>aff-1p::4*SV40::GFP, grl-2pro::mCherry</i>                     | multi-copy Inserted                   | Insertion of <i>csEx527</i>                                                                                               |
| <i>csEx680</i> | <i>grl-2pro::AFF-1, grl-2pro::mRFP; RDY-2::GFP</i>                | multi-copy external chromosomal array | Injection of pFS108 (30 ng $\mu\text{L}^{-1}$ ) and pCFJ90 (2 ng $\mu\text{L}^{-1}$ )                                     |
| <i>csEx539</i> | <i>aff-1pro::AFF-1, myo-2p::RFP</i>                               | multi-copy external chromosomal array | Injection of pFS122 (30 ng $\mu\text{L}^{-1}$ ) and pCFJ90 (2 ng $\mu\text{L}^{-1}$ )                                     |
| <i>csEx419</i> | <i>lin-48pro::AFF-1, myo-2p::RFP</i>                              | multi-copy external chromosomal array | Injection of pFS102 (30 ng $\mu\text{L}^{-1}$ ) and pCFJ90 (2 ng $\mu\text{L}^{-1}$ )                                     |
| <i>csEx451</i> | <i>grl-2pro::aff-1, myo-2p::RFP</i>                               | multi-copy external chromosomal array | Injection of pFS108 (30 ng $\mu\text{L}^{-1}$ ) and pCFJ90 (2 ng $\mu\text{L}^{-1}$ )                                     |
| <i>csEx585</i> | <i>aff-1pro::AFF-1, lin-48p::mCherry, lin-48p::LET-653::sfGFP</i> | multi-copy external chromosomal array | Injection of pFS122 (30 ng $\mu\text{L}^{-1}$ ), pJAF2 (5 ng/ $\mu\text{l}$ ) and pHS4 (50 ng $\mu\text{L}^{-1}$ )        |
| <i>csEx587</i> | <i>grl-2p::AFF-1, lin-48p::mCherry, lin-48p::LET-653::sfGFP</i>   | multi-copy external chromosomal array | Injection of pFS108 (30 ng $\mu\text{L}^{-1}$ ) and pJAF2 (5 ng $\mu\text{L}^{-1}$ ) and pHS4 (50 ng $\mu\text{L}^{-1}$ ) |
| <i>csEx742</i> | <i>grl-2pro::mCherry</i>                                          | multi-copy external chromosomal array | Injection of pFS107 (30 ng $\mu\text{L}^{-1}$ )                                                                           |
| <i>csEx749</i> | <i>grl-2pro ::zif-1, CC ::GFP</i>                                 | multi-copy external chromosomal array | Injection of pFS133 (30 ng $\mu\text{L}^{-1}$ ) and CC::GFP ? (30 ng $\mu\text{L}^{-1}$ )                                 |
| <i>csEx740</i> | <i>hsp-16-41pro::zif-1::mCherry, myo-2::GFP</i>                   | multi-copy external chromosomal array | Injection of pSA120 (30ng $\mu\text{L}^{-1}$ ) and <i>myo-2::GFP</i> (4 ng $\mu\text{L}^{-1}$ )                           |
| <i>csEx847</i> | <i>hsp-16-41pro::zif-1::mCherry, ajm-1::mCherry</i>               | multi-copy external chromosomal array | Injection of pSA120 (30 ng $\mu\text{L}^{-1}$ ) and pKM15 (30 ng $\mu\text{L}^{-1}$ )                                     |
| <i>csEx814</i> | <i>aff-1pro::aff-1::mCherry, grl-2pro::YFP</i>                    | multi-copy external chromosomal array | Injection of pFS145 (5 ng $\mu\text{L}^{-1}$ ) and pFSKM15 (20 ng $\mu\text{L}^{-1}$ )                                    |
| <i>cs232</i>   | <i>aff-1(cs232, [aff-1::ZF1, sqt-1(d), hs::cre, hygRO])</i>       | CRISPR-Cas9 generated allele          | See materials and methods                                                                                                 |
| <i>cs233</i>   | <i>rdy-2(cs233, [rdy-2::gfp])</i>                                 | CRISPR-Cas9 generated allele          | See materials and methods                                                                                                 |

Supplementary **Table 3.**

PCR primers used in this work

| <b>Name</b> | <b>Sequence</b>                                           |
|-------------|-----------------------------------------------------------|
| oFS-5       | tgtaccGGTACCaaaatgcgactgtggcaatggt                        |
| oFS-6       | tgtaccGCTAGCttagtaatcagatgaattcttc                        |
| oFS-7       | tgtaccGCTAGCaaaatgcgactgtggcaatggt                        |
| oFS-8       | tgtaccGGTACCttagtaatcagatgaattcttc                        |
| oFS-23      | gggaaaGGTACCATCGAGTGCCTCAGATTAGC                          |
| oFS-24      | gggaaaGATATCGCTCAGTTGAGGCCTATCG                           |
| oFS-45      | tgtaccgtcgacGGATGAGACAAAAGAAGATTG                         |
| oFS-46      | tgtaccCCCGGGCTGAAATTAATAATTATAGGC                         |
| oFS-64      | cgctACCGGTgctCCGCGGgtaatcagatgaattctcttt                  |
| oFS-69      | tgtaccGCTAGCaaaATGAGTGAGTGTTCCGCGAGTACC                   |
| oFS-70      | ggacCTACTTATACAATTCATCCATGCC                              |
| oFS-130     | GttactaaaagctcattcacaGTTTTAGAGCTAGAAATAGCAAGT             |
| oFS-131     | GAAAAATGCAGGAAAGTAAGTGTTTTAGAGCTAGAAATAGCAAGT             |
| oFS-140     | TGCGCCGCGGATGGTCTCAAAGGGTGAAGAAG                          |
| oFS-141     | CGACACCGGTCTACTTATACAATTCATCCATGCC                        |
| oFS-142     | cggccagtcgccgagctcaatgggtgtgtattctccc                     |
| oFS-143     | TCGCGTTTTGTATTCTGTgtaatcagatgaattctcttttc                 |
| oFS-144     | tgattacACAGAATACAAAACGCGACTTTG                            |
| oFS-145     | GTACAGATTCTCttaCCTCGGAACCTCAGCTCATC                       |
| oFS-146     | GTTCCGAGGtaaGAGAATCTGTACTTTCAATCCGG                       |
| oFS-147     | gtgtgaatgagcttATAACTTCGTATAATGTATGCTATACG                 |
| oFS-148     | TACGAAGTTATaagctcattcacacgggtgaatcc                       |
| oFS-149     | cagctatgaccatgtataaaatccttaaggcacgcc                      |
| oFS-150     | ggattttataacatggtcatagctgtttcctg                          |
| oFS-151     | tgagctgccggcgactggccgtcg                                  |
| oFS-167     | acgttgtaaaacgacggccagtcgccggcaGATGGGCAGTTGCGGCGg          |
| oFS-168     | CATCGATGCTCCTGAGGCTCCCGATGCTCCAAATGAAGATCGGATGGTACG       |
| oFS-169     | CGTGATTACAAGGATGACGATGACAAGAGATGAatgaattccaattccaagaatcga |
| oFS-170     | ggaaacagctatgaccatgtatcgatttcTCGTCGCTACACATCATGCC         |
| oFS-171     | ggtgagtgcacgtgtttcg                                       |
| oFS-172     | gtttgatctacaggtattgctgg                                   |
| oFS-173     | gatcaaacgggtgagtgacgGTTTTAGAGCTAGAAATAGCAAGT              |

Supplementary **Table 4.**

DNA plasmids used in this work

| <b>Name</b> | <b>description</b>                                                 | <b>backbone</b> | <b>method</b>                                                                                                                                                                                                                                                              |
|-------------|--------------------------------------------------------------------|-----------------|----------------------------------------------------------------------------------------------------------------------------------------------------------------------------------------------------------------------------------------------------------------------------|
| pFS127      | <i>aff-1pro</i><br>empty                                           | pPD49.26        | <i>aff-1</i> promoter PCR amplified from WRM0615dE03 with primers oFS-45 and oFS-46 and cloned into pPD49.26 (Addgene) as a Sall/Xmal digestion product                                                                                                                    |
| pFS115      | <i>aff-1pro::4*NLS::GFP</i>                                        | pPD49.26        | 4*SV40::GFP was PCR amplified from pPD121.83 (Addgene) with primers oFS-130 and oFS-131, and inserted as a Blunt Ended/NheI fragment in pFS127                                                                                                                             |
| pFS102      | <i>lin-48pro::aff-1</i>                                            | pPD49.26        | <i>aff-1</i> cDNA PCR amplified from pIZT:: <i>aff-1</i> with primers oFS-7 and oFS-8 and cloned into pJP49 as a NheI/KpnI digestion product                                                                                                                               |
| pFS108      | <i>grl-2pro::aff-1</i>                                             | pPD49.26        | <i>aff-1</i> cDNA PCR amplified from pIZT:: <i>aff-1</i> with primers oFS-7 and oFS-8 and cloned into pJC2 as a NheI/KpnI digestion product                                                                                                                                |
| pFS122      | <i>aff-1pro::aff-1</i>                                             | pPD49.26        | <i>aff-1</i> cDNA PCR amplified from pIZT:: <i>aff-1</i> with primers oFS-7 and oFS-8 and cloned into pFS127 as a NheI/KpnI digestion product                                                                                                                              |
| pFS145      | <i>aff-1pro::AFF-1::mCherry</i>                                    | pPD49.26        | PCR amplification of <i>aff-1</i> cDNA without stop codon by oFS-7 and oFS-64 and in frame addition of <i>mCherry</i> coding sequence, PCR amplified from pSA120 (Addgene) with oFS-140 and oFS-141                                                                        |
| pFS107      | <i>grl-2pro::mCherry</i>                                           | pPD49.26        | PCR amplification of <i>grl-2pro</i> from pKM15 with oMS-201 and oMS-203, and clone as SphI-BamHI fragment into pPD49.26 to obtain pJC2, and <i>mCherry</i> coding sequence was PCR amplified from pMH4 (Max Heiman) with oFS-23 and oFS-24 and was inserted as KpnI-EcoRV |
| pFS133      | <i>grl-2pro::zif-1::mCherry</i>                                    | pPD49.26        | PCR amplification of <i>zif-1::mCherry</i> from pSA120 with oFS-69 and oFS-70 and inserted into the pPD49.26 derivatives, pJC2 ( <i>grl-2pro</i> )                                                                                                                         |
| pFS135      | <i>lin-48pro::zif-1::mCherry</i>                                   | pPD49.26        | PCR amplification of <i>zif-1::mCherry</i> from pSA120 with oFS-69 and oFS-70 and inserted into the pPD49.26 derivatives, pJP49 ( <i>lin-48pro</i> )                                                                                                                       |
| pFS144      | Peft-3::Cas9 + <i>aff-1</i> sgRNA                                  | pDD162          | See material and methods for full description                                                                                                                                                                                                                              |
| PRFR55      | Peft-3::Cas9 + <i>rdy-2</i> sgRNA                                  | pDD162          | See material and methods for full description                                                                                                                                                                                                                              |
| pFS146      | AFF-1 repair templates + ZF1 <sup>^</sup> SEC <sup>^</sup> S TOP   | pDD282          | See material and methods for full description                                                                                                                                                                                                                              |
| pRFR56      | RDY-2 repair templates + GFP <sup>^</sup> SEC <sup>^</sup> 3 xFlag | pDD282          | See material and methods for full description                                                                                                                                                                                                                              |

Supplementary references:

1. Abdus-Saboor I, *et al.* Notch and Ras promote sequential steps of excretory tube development in *C. elegans*. *Development* **138**, 3545-3555 (2011).
2. Jacobs D, Beitel GJ, Clark SG, Horvitz HR, Kornfeld K. Gain-of-function mutations in the *Caenorhabditis elegans* *lin-1* ETS gene identify a C-terminal regulatory domain phosphorylated by ERK MAP kinase. *Genetics* **149**, 1809-1822 (1998).
3. Howard RM, Sundaram MV. *C. elegans* EOR-1/PLZF and EOR-2 positively regulate Ras and Wnt signaling and function redundantly with LIN-25 and the SUR-2 Mediator component. *Genes Dev* **16**, 1815-1827 (2002).
4. Howell K, Arur S, Schedl T, Sundaram MV. EOR-2 is an obligate binding partner of the BTB-zinc finger protein EOR-1 in *Caenorhabditis elegans*. *Genetics* **184**, 899-913 (2010).
